# Supplementary material for: Hydrostatic pressure-induced reversible phase transformation in iron oxide nanoparticles
Source: Royal Society of Chemistry journal article supplement (doi:10.1039/d4nr01443j), 2024-01-01
Supplement: d4nr01443j1.pdf [file d4nr01443j1.pdf]

## Electronic Supplementary Information

### Hydrostatic pressure induced reversible phase transformation in iron oxide nanoparticles.

Arkaprava Das<sup>1\*</sup>, Anumeet Kaur<sup>2</sup>, and Parwinder Kaur<sup>3</sup>

<sup>1</sup>Chimie des Interaction Plasma surface, Université of Mons, Mons, Belgium

<sup>2</sup>Department of Applied Sciences and Humanities, Global Group of Institutes, Amritsar, Punjab, 143501, India

<sup>3</sup>Department of Applied Sciences, Bhai Gurdas Group of Institutes, Sangrur, Punjab 148001, India

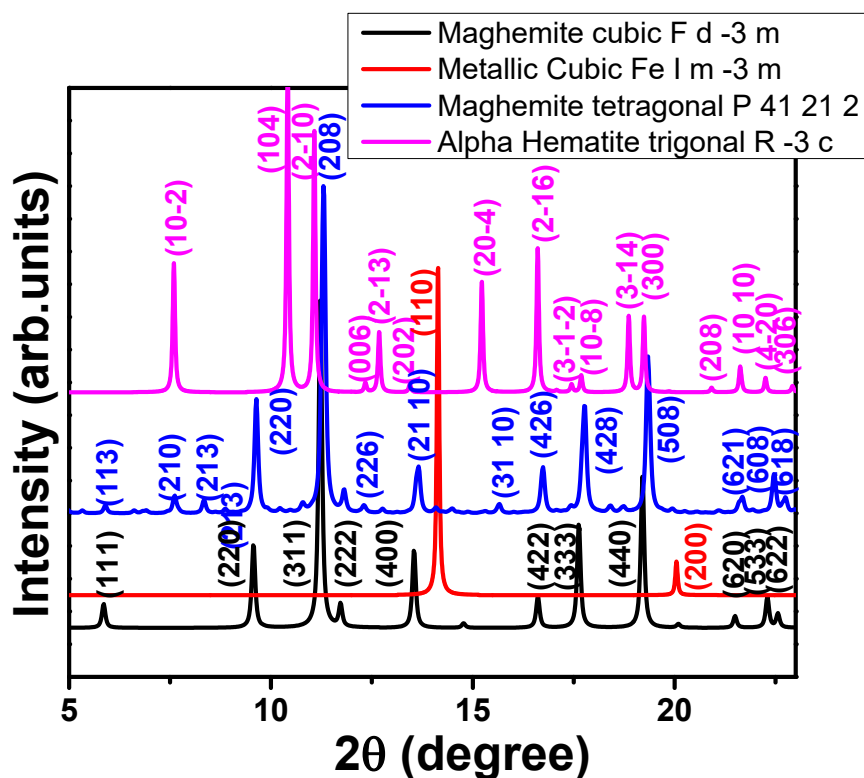

ESF1: Standard XRD patterns for cubic, tetragonal maghemite iron oxide and metallic Fe phase

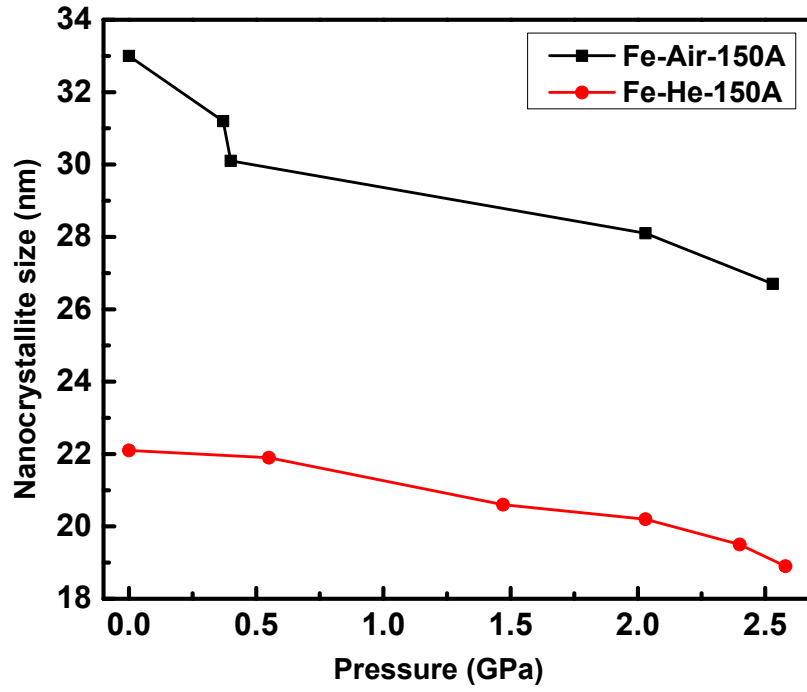

**ESF2:** Reducing nanocrystallite size with increasing pressure for Fe-Air-150A and Fe-He-150A sample.

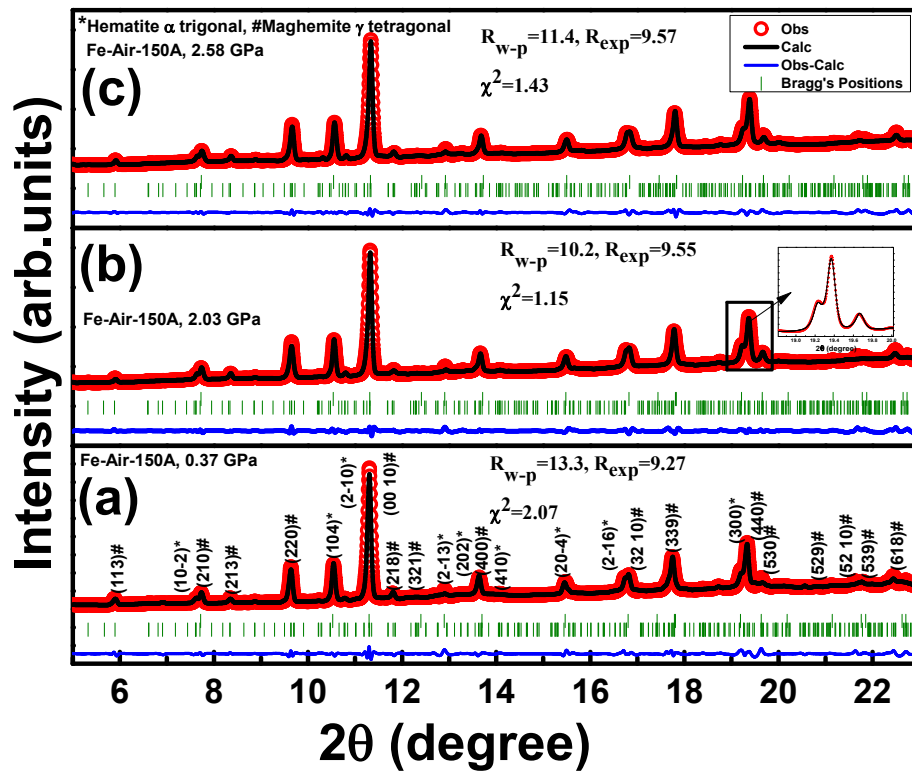

ESF3: Reitveld Refinement for Fe-Air-150A sample at 0.37 (a), 2.03 (b) and 2.58 GPa (c) pressure

**EST1: Nanocrystallite size at different pressure for both Fe-Air-150A and Fe-He-150A samples**

| Sample      | Pressure (GPa) | Peak  | Peak position ( $2\theta$ ) | FWHM  | Crystallite Size (nm) |
|-------------|----------------|-------|-----------------------------|-------|-----------------------|
| Fe-Air-150A | 0.00           | (313) | 11.29                       | 0.071 | 33.0                  |
| Fe-Air-150A | 0.37           | (313) | 11.30                       | 0.082 | 31.2                  |
| Fe-Air-150A | 0.40           | (313) | 11.30                       | 0.085 | 30.1                  |
| Fe-Air-150A | 2.03           | (313) | 11.32                       | 0.091 | 28.1                  |
| Fe-Air-150A | 2.53           | (313) | 11.34                       | 0.096 | 26.7                  |
| Fe-He-150A  | 0.00           | (110) | 14.04                       | 0.116 | 22.1                  |
| Fe-He-150A  | 0.55           | (110) | 14.05                       | 0.117 | 21.9                  |
| Fe-He-150A  | 1.47           | (110) | 14.08                       | 0.124 | 20.6                  |
| Fe-He-150A  | 2.03           | (110) | 14.09                       | 0.127 | 20.2                  |
| Fe-He-150A  | 2.40           | (110) | 14.10                       | 0.132 | 19.5                  |
| Fe-He-150A  | 2.58           | (110) | 14.11                       | 0.136 | 18.9                  |

**EST2: Refinement results for Fe-Air-150A sample at 0 GPa pressure****Results of the Reitveld refinement for Fe-Air-150A sample at 0 GPa pressure**

**Trigonal  $\alpha$  phase with space group  $R\bar{3}c$ ,**

**Cell parameters:- a = b = 5.033 (6) Å, c = 13.741 (26) Å, Volume = 348.049 (0.008) (Å)<sup>3</sup>**

| Atom       | Position | x     | y     | z     | $B_{iso}$ (Å <sup>2</sup> ) | Occupancy |
|------------|----------|-------|-------|-------|-----------------------------|-----------|
| <b>Fe0</b> | 12c      | 0.000 | 0.000 | 0.145 | 2.261                       | 0.365     |
| <b>O1</b>  | 18e      | 0.000 | 0.273 | 0.750 | 0.001                       | 0.987     |

**Tetragonal maghemite phase with space group  $P41212$**

**Cell parameters:- a = b = 8.332 (8) Å, c = 25.089 (30) Å, Volume = 1741.951 (0.031) (Å)<sup>3</sup>**

| Atom       | Position | x     | y     | z     | $B_{iso}$ (Å <sup>2</sup> ) | Occupancy |
|------------|----------|-------|-------|-------|-----------------------------|-----------|
| <b>Fe1</b> | 8b       | 0.771 | 0.946 | 0.063 | 0.216                       | 1.000     |
| <b>Fe2</b> | 8b       | 0.775 | 0.982 | 0.353 | 0.009                       | 0.974     |
| <b>Fe3</b> | 8b       | 0.714 | 1.044 | 0.849 | 0.035                       | 0.999     |

|               |                                              |                                            |       |                                                  |       |              |
|---------------|----------------------------------------------|--------------------------------------------|-------|--------------------------------------------------|-------|--------------|
| <b>Fe4</b>    | 4a                                           | 0.372                                      | 0.372 | 0.000                                            | 1.474 | <b>0.495</b> |
| <b>Fe5</b>    | 8b                                           | 0.634                                      | 0.666 | 0.346                                            | 1.190 | 0.927        |
| <b>Fe6</b>    | 8b                                           | 0.232                                      | 0.876 | 0.948                                            | 0.002 | 1.000        |
| <b>Fe7</b>    | 8b                                           | 0.442                                      | 0.842 | 0.323                                            | 0.901 | 0.961        |
| <b>Fe8</b>    | 8b                                           | 0.299                                      | 0.929 | 0.672                                            | 0.038 | 1.000        |
| <b>Fe9</b>    | 4a                                           | 0.143                                      | 0.143 | 0.000                                            | 0.036 | <b>0.421</b> |
| <b>O1</b>     | 8b                                           | 0.614                                      | 0.666 | -0.008                                           | 0.001 | 0.712        |
| <b>O2</b>     | 8b                                           | 0.575                                      | 0.963 | 0.370                                            | 0.002 | 0.851        |
| <b>O3</b>     | 8b                                           | 0.675                                      | 0.859 | 0.625                                            | 0.001 | 0.713        |
| <b>O4</b>     | 8b                                           | 0.059                                      | 0.327 | 0.057                                            | 2.194 | 1.000        |
| <b>O5</b>     | 8b                                           | 0.302                                      | 0.410 | 0.308                                            | 0.001 | 1.000        |
| <b>O6</b>     | 8b                                           | 0.088                                      | 0.322 | 0.669                                            | 0.094 | 0.820        |
| <b>O7</b>     | 8b                                           | 0.146                                      | 0.869 | 0.012                                            | 0.001 | 1.000        |
| <b>O8</b>     | 8b                                           | 0.117                                      | 0.907 | 0.328                                            | 0.001 | 0.981        |
| <b>O9</b>     | 8b                                           | 0.052                                      | 0.911 | 0.712                                            | 2.720 | 1.000        |
| <b>O10</b>    | 8b                                           | 0.387                                      | 0.627 | -0.001                                           | 0.001 | 1.000        |
| <b>O11</b>    | 8b                                           | 0.414                                      | 0.647 | 0.339                                            | 0.001 | 0.956        |
| <b>O12</b>    | 8b                                           | 0.364                                      | 0.616 | 0.669                                            | 0.001 | 1.000        |
| <b>%Molar</b> | <b>84.22 % (Tetragonal)</b>                  | <b>15.78 % (Trigonal)</b>                  |       | <b><math>R_{w-p} = 10, R_{exp} = 6.65</math></b> |       |              |
|               | <b><math>R_{B(Tetragonal)} = 2.63</math></b> | <b><math>R_{B(Trigonal)} = 0.70</math></b> |       | <b><math>\chi^2 = 2.32</math></b>                |       |              |

**EST3: Refinement results for Fe-He-150A sample at 0 Gpa pressure**

**Results of the Reitveld refinement for Fe-He-150A sample at 0 GPa pressure**

**Metallic Cubic Fe phase with space group  $Im\bar{3}m$ ,**

**Cell parameters:- a = b = c = 2.860 (01) Å, Volume = 23.624 (0.002) (Å)<sup>3</sup>**

| <b>Atom</b> | <b>x</b> | <b>y</b> | <b>z</b> | <b><math>B_{iso}(\text{Å}^2)</math></b> | <b>Occupancy</b> |
|-------------|----------|----------|----------|-----------------------------------------|------------------|
| <b>Fe</b>   | 0.00000  | 0.00000  | 0.0000   | 0.010                                   | 0.920            |

**Cubic maghemite phase with space group  $Fd\bar{3}m$**

| Cell parameters:- a = b = c = 8.332 (8) Å, Volume = 588.621 (0.002) (Å) <sup>3</sup> |                            |                                 |       |                                                     |                       |           |
|--------------------------------------------------------------------------------------|----------------------------|---------------------------------|-------|-----------------------------------------------------|-----------------------|-----------|
| Atom                                                                                 | Position                   | x                               | y     | z                                                   | $B_{iso}(\text{Å}^2)$ | Occupancy |
| Fe1                                                                                  | 8a                         | 0.125                           | 0.125 | 0.125                                               | 0.001                 | 0.461     |
| Fe2                                                                                  | 16d                        | 0.500                           | 0.500 | 0.500                                               | 0.009                 | 0.864     |
| O                                                                                    | 32e                        | 0.651                           | 0.651 | 0.651                                               | 0.000                 | 1.000     |
| %Molar                                                                               | 61.8 % (cubic metallic Fe) | 38.2 % (Cubic maghemite)        |       | $R_{w-p} = 9.56, R_{exp} = 8.14$<br>$\chi^2 = 1.38$ |                       |           |
|                                                                                      | $R_{B(cubic Fe)} = 1.10$   | $R_{B(cubic Maghemite)} = 2.36$ |       |                                                     |                       |           |

EST4: Refinement results for Fe-He-150A sample at 0.55 GPa pressure

| Results of the Reitveld refinement for Fe-He-150A sample at 0.55 GPa pressure                       |          |       |       |       |                       |              |
|-----------------------------------------------------------------------------------------------------|----------|-------|-------|-------|-----------------------|--------------|
| Metallic Cubic Fe phase with space group $Im\bar{3}m$ ,                                             |          |       |       |       |                       |              |
| Cell parameters:- a = b = c = 2.865 (0) Å, Volume = 23.521 (0.008) (Å) <sup>3</sup>                 |          |       |       |       |                       |              |
| Atom                                                                                                |          | x     | y     | z     | $B_{iso}(\text{Å}^2)$ | Occupancy    |
| Fe0                                                                                                 |          | 0.000 | 0.000 | 0.000 | 0.001                 | 0.910        |
| Tetragonal maghemite phase with space group $P41212$                                                |          |       |       |       |                       |              |
| Cell parameters:- a = b = 8.334 (0) Å, c = 25.097 (0) Å, Volume = 1743.434 (0.031) (Å) <sup>3</sup> |          |       |       |       |                       |              |
| Atom                                                                                                | Position | x     | y     | z     | $B_{iso}(\text{Å}^2)$ | Occupancy    |
| Fe1                                                                                                 | 8b       | 1.291 | 0.897 | 0.036 | 0.003                 | 0.943        |
| Fe2                                                                                                 | 8b       | 1.077 | 1.034 | 0.385 | 0.050                 | 1.000        |
| Fe3                                                                                                 | 8b       | 0.728 | 4.007 | 0.708 | 0.050                 | 1.000        |
| Fe4                                                                                                 | 4a       | 0.776 | 0.776 | 0.000 | 0.005                 | <b>0.484</b> |
| Fe5                                                                                                 | 8b       | 0.615 | 0.615 | 0.319 | 0.004                 | 0.778        |
| Fe6                                                                                                 | 8b       | 0.389 | 0.863 | 0.997 | 0.005                 | 1.000        |
| Fe7                                                                                                 | 8b       | 0.374 | 0.887 | 0.331 | 0.050                 | 1.000        |
| Fe8                                                                                                 | 8b       | 0.306 | 0.848 | 0.667 | 0.050                 | 1.000        |
| Fe9                                                                                                 | 4a       | 0.129 | 0.129 | 0.000 | 0.036                 | <b>0.548</b> |
| O1                                                                                                  | 8b       | 0.994 | 0.866 | 0.013 | 0.050                 | 1.000        |

|               |                                            |                                              |       |                                                    |       |       |
|---------------|--------------------------------------------|----------------------------------------------|-------|----------------------------------------------------|-------|-------|
| <b>O2</b>     | 8 <i>b</i>                                 | 0.662                                        | 0.797 | 0.338                                              | 0.005 | 1.000 |
| <b>O3</b>     | 8 <i>b</i>                                 | 1.058                                        | 0.873 | 0.663                                              | 0.005 | 1.000 |
| <b>O4</b>     | 8 <i>b</i>                                 | 0.192                                        | 0.346 | 0.000                                              | 0.005 | 1.000 |
| <b>O5</b>     | 8 <i>b</i>                                 | 0.017                                        | 0.193 | 0.340                                              | 0.001 | 1.000 |
| <b>O6</b>     | 8 <i>b</i>                                 | 0.088                                        | 0.322 | 0.669                                              | 0.094 | 0.820 |
| <b>O7</b>     | 8 <i>b</i>                                 | 0.123                                        | 0.353 | 0.671                                              | 0.005 | 0.762 |
| <b>O8</b>     | 8 <i>b</i>                                 | 0.177                                        | 0.816 | 0.331                                              | 0.050 | 0.816 |
| <b>O9</b>     | 8 <i>b</i>                                 | 0.133                                        | 0.853 | 0.670                                              | 0.050 | 1.000 |
| <b>O10</b>    | 8 <i>b</i>                                 | 0.383                                        | 0.626 | 0.000                                              | 0.001 | 1.000 |
| <b>O11</b>    | 8 <i>b</i>                                 | 0.406                                        | 0.626 | 0.338                                              | 0.001 | 0.912 |
| <b>O12</b>    | 8 <i>b</i>                                 | 0.387                                        | 0.617 | 0.676                                              | 0.050 | 0.878 |
| <b>%Molar</b> | <b>19.88 % (Cubic Fe)</b>                  | <b>80.12 % (Tetragonal maghemite)</b>        |       | <b><math>R_{w-p} = 8.37, R_{exp} = 7.80</math></b> |       |       |
|               | <b><math>R_{B(cubic Fe)} = 7.00</math></b> | <b><math>R_{B(Tetragonal)} = 0.42</math></b> |       | <b><math>\chi^2 = 1.15</math></b>                  |       |       |

**EST5:** Refinement results for Fe-He-150A sample at 2.40 GPa pressure

**Results of the Reitveld refinement for Fe-He-150A sample at 2.40 GPa pressure**

**Metallic Cubic Fe phase with space group  $Im\bar{3}m$ ,**

**Cell parameters:- a = b = c = 2.854 (001) Å, Volume = 23.270 (0.002) (Å)<sup>3</sup>**

| Atom | <i>x</i> | <i>y</i> | <i>z</i> | $B_{iso}(\text{Å}^2)$ | Occupancy |
|------|----------|----------|----------|-----------------------|-----------|
| Fe   | 0.000    | 0.000    | 0.00     | 0.010                 | 0.920     |

**Cubic maghemite phase with space group  $Fd\bar{3}m$**

**Cell parameters:- a = b = c = 8.332 (8) Å, Volume = 579.205 (0.031) (Å)<sup>3</sup>**

| Atom | Position    | <i>x</i> | <i>y</i> | <i>z</i> | $B_{iso}(\text{Å}^2)$ | Occupancy |
|------|-------------|----------|----------|----------|-----------------------|-----------|
| Fe1  | 8 <i>a</i>  | 0.125    | 0.125    | 0.125    | 0.001                 | 0.517     |
| Fe2  | 16 <i>d</i> | 0.500    | 0.500    | 0.500    | 0.009                 | 0.717     |
| O    | 32 <i>e</i> | 0.250    | 0.250    | 0.250    | 0.000                 | 1.000     |

|               |                                            |                                                 |  |                                                    |  |  |
|---------------|--------------------------------------------|-------------------------------------------------|--|----------------------------------------------------|--|--|
| <b>%Molar</b> | <b>17.33 % (cubic metallic Fe)</b>         | <b>82.67 % (Cubic maghemite)</b>                |  | <b><math>R_{w-p} = 10.2, R_{exp} = 8.90</math></b> |  |  |
|               | <b><math>R_{B(cubic Fe)} = 1.17</math></b> | <b><math>R_{B(cubic maghemite)} = 20</math></b> |  | <b><math>\chi^2 = 1.31</math></b>                  |  |  |
